# Supplementary material for: Clinical Outcomes of Patients with Chronic Neuropathic Form of Gaucher Disease in the Spanish Real-World Setting: A Retrospective Study
Source: MDPI journal article supplement (doi:10.3390/biomedicines11102861), 2023-10-22
Supplement: s1 [file s1]

Supplementary table 1. Demographic data.

| Patient code | Age at inclusion (years) | Age at disease onset (years) | Age at diagnosis (years) | Sex    |
|--------------|--------------------------|------------------------------|--------------------------|--------|
| 1            | 9                        | 0.9                          | 0.9                      | Male   |
| 2            | 15                       | 3                            | 3                        | Male   |
| 3            | 26                       | 0.2                          | 0.2                      | Male   |
| 4            | 22                       | 20                           | 20                       | Male   |
| 5            | 4                        | 1.1                          | 1.2                      | Female |
| 6            | 8                        | 2                            | 2                        | Male   |
| 7            | 21                       | 0.03                         | 0.5                      | Male   |
| 8            | 26                       | 1.5                          | 1.5                      | Male   |
| 9            | 21                       | 1                            | 1                        | Male   |
| 10           | 16                       | 0.9                          | 0.9                      | Male   |
| 11           | 12                       | 1.7                          | 1.9                      | Female |
| 12           | 16                       | 0.8                          | 1                        | Male   |
| 13           | 10                       | 2.5                          | 3.5                      | Female |
| 14           | 8                        | 1                            | 1.2                      | Male   |
| 15           | 8                        | 1                            | 1.2                      | Female |
| 16           | 1                        | 0.6                          | 1.1                      | Female |
| 17           | 15                       | 1                            | 1.5                      | Male   |
| 18           | 24                       | 0                            | 0                        | Male   |
| 19           | 5                        | 0.42                         | 0.58                     | Male   |

**Supplementary table 2.** Medical history.

| <b>Medical history</b>              | <b>Status</b> | <b>n</b> | <b>%</b> |
|-------------------------------------|---------------|----------|----------|
| <b>Normal pregnancy</b>             | Yes           | 14       | 74       |
|                                     | No            | 4        | 21       |
|                                     | Unknown       | 1        | 5        |
| <b>Normal perinatal development</b> | Yes           | 5        | 26       |
|                                     | No            | 13       | 68       |
|                                     | Unknown       | 1        | 5        |
| <b>Family history of GD3</b>        | Yes           | 3        | 16       |
|                                     | No            | 15       | 79       |
|                                     | Unknown       | 1        | 5        |
| <b>Dementias</b>                    | Yes           | 0        | 0        |
|                                     | No            | 18       | 95       |
|                                     | Unknown       | 1        | 5        |
| <b>Familial Parkinson</b>           | Yes           | 1        | 5        |
|                                     | No            | 17       | 89       |
|                                     | Unknown       | 1        | 5        |
| <b>Consanguinity</b>                | Yes           | 4        | 21       |
|                                     | No            | 15       | 79       |
|                                     | Unknown       | 0        | 0        |
